# Supplementary material
Source: MDPI journal article supplement (https://www.mdpi.com/2813-0464/3/2/16)
Supplement: s1 [file s1]

Archive with 1 entries (1 files):
- applbiosci-2930343-supplementary.pdf
